# Supplementary material for: Theoretically evaluating two-dimensional tetragonal Si2Se2 and SiSe2 nanosheets as anode materials for alkali metal-ion batteries
Source: Royal Society of Chemistry journal article supplement (doi:10.1039/d2cp02782h), 2022-01-01
Supplement: d2cp02782h1.pdf [file d2cp02782h1.pdf]

## Supporting Information

### Theoretically Evaluating Two-Dimensional Tetragonal Si<sub>2</sub>Se<sub>2</sub> and SiSe<sub>2</sub> Nanosheets as Anode Materials for Alkali Metal-Ion Batteries

Jiaming Wang<sup>1,2</sup>, Hao Wu<sup>1,3</sup>, Zhixiao Liu<sup>4,\*</sup>, Min Pan<sup>1,\*</sup>, Zheng Huang<sup>2</sup>, Liu Pan<sup>2</sup>,  
Lei Han<sup>1,3</sup>, Kun Zhang<sup>1,3</sup>, Yong Zhao<sup>1</sup>, Huiqiu Deng<sup>5</sup>

<sup>1</sup>Superconductivity and New Energy R&D Center, Key Laboratory of Advanced  
Technology of Materials (Ministry of Education), Southwest Jiaotong University,  
Chengdu, China

<sup>2</sup>School of Physical Science and Technology, Southwest Jiaotong University,  
Chengdu, China

<sup>3</sup>School of Materials Science and Engineering, Southwest Jiaotong University,  
Chengdu, China

<sup>4</sup>College of Materials Science and Engineering, Hunan University, Changsha 410082,  
China

<sup>5</sup>School of Physics and Electronics, Hunan University, Changsha 410082, China

\*Correspondence: [zxliu@hnu.edu.cn](mailto:zxliu@hnu.edu.cn) (Z. Liu); [mpan@swjtu.edu.cn](mailto:mpan@swjtu.edu.cn) (M. Pan)

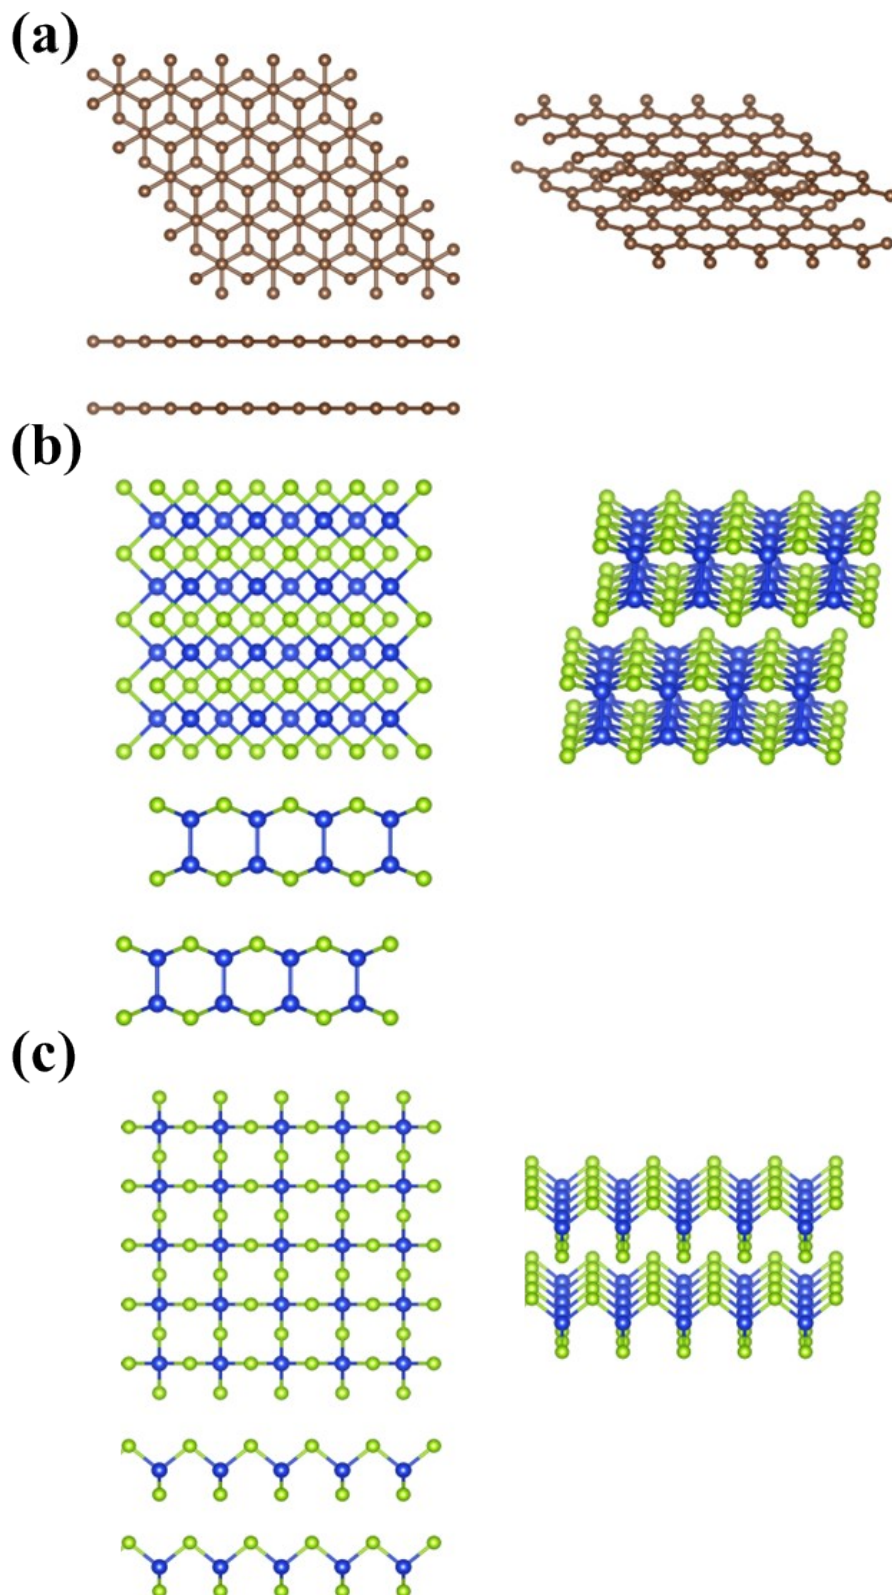

**Figure S1:** (a) Stable stacking configuration of two layers of graphene. (b) Stable stacking configuration of two layers of  $\text{Si}_2\text{Se}_2$ . (c) Stable stacking configuration of two layers of  $\text{SiSe}_2$ .

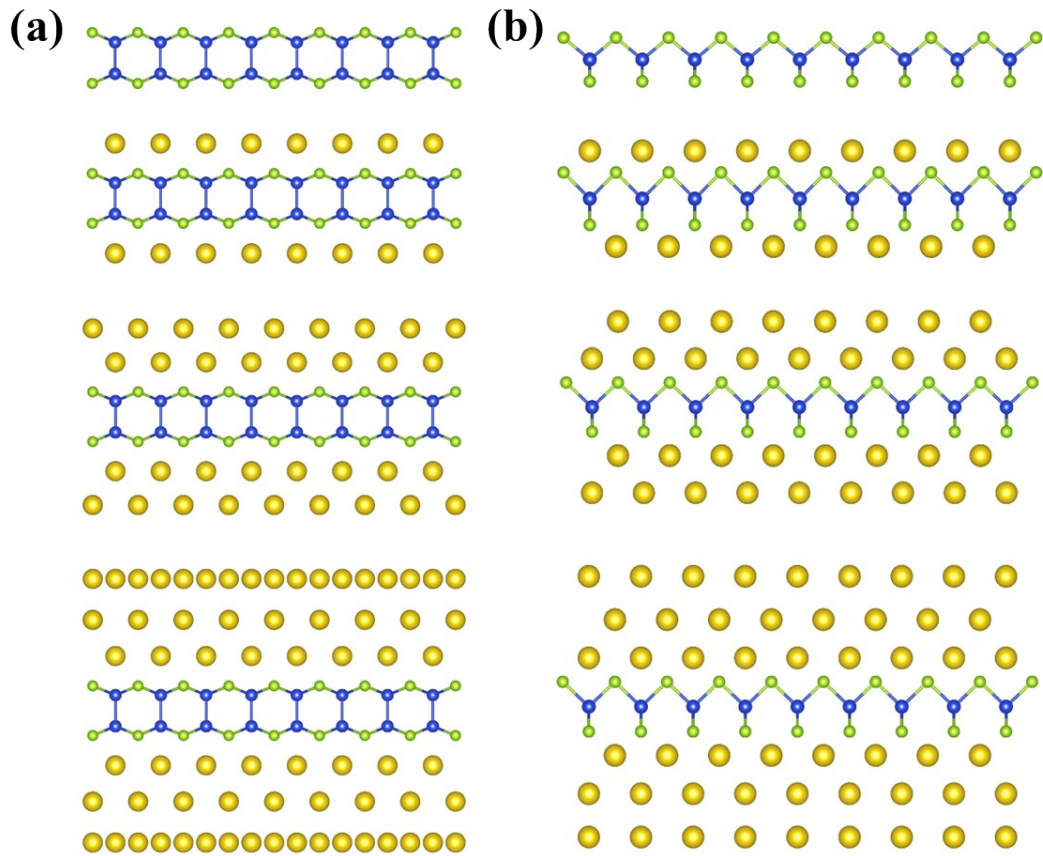

**Figure S2:** (a) Clean  $\text{Si}_2\text{Se}_2$  and  $\text{Si}_2\text{Se}_2$  with one-, two- and three-layer Na adsorption on both sides. (b) Clean  $\text{SiSe}_2$  and  $\text{SiSe}_2$  with one-, two- and three-layer Na adsorption on both sides.
